# Supplementary material for: A molecular cobalt catalyst supported by an amine-bis(phenolate) ligand for both electrolytic and photolytic water reduction
Source: Royal Society of Chemistry journal article supplement (doi:10.1039/c5ra14753k), 2015-01-01
Supplement: c5ra14753k1.pdf [file c5ra14753k1.pdf]

# A molecular cobalt catalyst supported by an amine-bis(phenolate) ligand for both electrolytic and photolytic water reduction

Ling-Zhi Fu, Ling-Ling Zhou and Shu-Zhong Zhan\*

*College of Chemistry and Chemical Engineering, South China University of Technology,*

*Guangzhou 510640, China.*

## Supplementary Materials

Table of context

|   |                                                                                                                                                                                                                                                                                                                               |
|---|-------------------------------------------------------------------------------------------------------------------------------------------------------------------------------------------------------------------------------------------------------------------------------------------------------------------------------|
| 1 | <b>Fig. S1.</b> The UV spectra of complex <b>1</b> and the related compounds in MeCN.                                                                                                                                                                                                                                         |
| 2 | <b>Fig. S2.</b> The UV spectrum of 0.10 mM complex <b>1</b> in water.                                                                                                                                                                                                                                                         |
| 3 | <b>Fig. S3.</b> The UV spectra of 0.10 mM complex <b>1</b> in 0.25 M phosphate buffered solutions at different pHs.                                                                                                                                                                                                           |
| 4 | <b>Fig. S4.</b> Scan rate dependence of precatalytic waves at -1.58 V (Co <sup>II/I</sup> ) and 0.80 V (Co <sup>III/II</sup> ) for a 0.25 mM solution of complex <b>1</b> (0.10 M [n-Bu <sub>4</sub> N]ClO <sub>4</sub> ), at scan rates from 100 to 250 mV/s.                                                                |
| 5 | <b>Fig. S5.</b> CV of ligand (23 μM). Conditions: 0.10 M [n-Bu <sub>4</sub> N]ClO <sub>4</sub> as supporting electrolyte, scan rate: 100 mV/s, glassy carbon working electrode (1 mm diameter), Pt counter electrode, Ag/AgNO <sub>3</sub> reference electrode.                                                               |
| 6 | <b>Fig. S6.</b> CV of CoCl <sub>2</sub> ·6H <sub>2</sub> O (23 μM). Conditions: 0.10 M [n-Bu <sub>4</sub> N]ClO <sub>4</sub> as supporting electrolyte, scan rate: 100 mV/s, glassy carbon working electrode (1 mm diameter), Pt counter electrode, Ag/AgNO <sub>3</sub> reference electrode.                                 |
| 7 | <b>Fig. S7.</b> CV of the mixture of CoCl <sub>2</sub> ·6H <sub>2</sub> O (23 μM) + ligand (23 μM). Conditions: 0.10 M [n-Bu <sub>4</sub> N]ClO <sub>4</sub> as supporting electrolyte, scan rate: 100 mV/s, glassy carbon working electrode (1 mm diameter), Pt counter electrode, Ag/AgNO <sub>3</sub> reference electrode. |

|    |                                                                                                                                                                                                                                                                                                                                                                                                                                                                                                                                                                                                                        |
|----|------------------------------------------------------------------------------------------------------------------------------------------------------------------------------------------------------------------------------------------------------------------------------------------------------------------------------------------------------------------------------------------------------------------------------------------------------------------------------------------------------------------------------------------------------------------------------------------------------------------------|
| 8  | <b>Fig. S8.</b> GC traces after a 2-h controlled-potential electrolysis at $-1.45$ V vs Ag/AgCl of $4.0$ $\mu$ M complex <b>1</b> in DMF with $3.4$ mM acid. A standard of $\text{CH}_4$ was added for calibration purposes.                                                                                                                                                                                                                                                                                                                                                                                           |
| 9  | <b>Fig. S9.</b> Turnover frequency (mol $\text{H}_2$ /mol catalysts/h) for electrocatalytic hydrogen production by complex <b>1</b> ( $0.25$ $\mu$ M) under a series of overpotentials.                                                                                                                                                                                                                                                                                                                                                                                                                                |
| 10 | <b>Fig. S10.</b> (a) GC traces after a 1-h controlled-potential electrolysis at $-1.45$ V vs Ag/AgCl of $2.0$ $\mu$ M complex <b>1</b> in $0.25$ M phosphate buffer, pH $7.0$ . A standard of $\text{CH}_4$ was added for calibration purposes. (b) Measured (black) and calculated (red) pH changes assuming a $100\%$ Faradic efficiency of complex <b>1</b> during electrolysis. (the theoretical pH change over time can be calculated by the equation of $pH = 14 + \lg \frac{\sum It}{FV}$ where $I$ = current (A), $t$ = time (s), $F$ = Faraday constant ( $96485$ C/mol), $V$ = solution volume ( $0.04$ L)). |
| 11 | <b>Fig. S11.</b> Turnover frequency (mol $\text{H}_2$ /mol catalysts/h) for electrocatalytic hydrogen production by complex <b>1</b> ( $2.0$ $\mu$ M) under a series of overpotentials (mV) at pH $7.0$ .                                                                                                                                                                                                                                                                                                                                                                                                              |
| 12 | <b>Fig. S12.</b> EDS of a glassy carbon electrode after $3$ h electrolysis. There was no significant change in the EDS after a $3$ h electrolysis period.                                                                                                                                                                                                                                                                                                                                                                                                                                                              |
| 13 | <b>Fig. S13.</b> (a) Extended controlled potential electrolysis of $4.5$ $\mu$ M complex <b>1</b> , showing charge buildup versus time with an applied potential of $-1.45$ V versus Ag/AgCl. (b) Catalytic current obtained upon controlled potential electrolysis with $4.5$ $\mu$ M complex <b>1</b> . Conditions: $0.25$ M buffer solution, pH $7.0$ , GC working electrode ( $1.25$ $\text{cm}^2$ ), Ag/AgCl in saturated KCl reference electrode, Pt wire counter electrode, $60$ h.                                                                                                                             |
| 14 | <b>Fig. S14.</b> Effect of pHs on different photocatalytic systems, containing $0.70$ mM $\text{Ru}(\text{bpy})_3\text{Cl}_2$ , $0.08$ M ascorbic acid and $0.10$ mM complex <b>1</b> , under air.                                                                                                                                                                                                                                                                                                                                                                                                                     |
| 15 | <b>Fig. S15.</b> Effect of addition of $\text{Ru}(\text{bpy})_3\text{Cl}_2$ on different photocatalytic systems, containing $0.15$ M ascorbic acid and $0.10$ mM complex <b>1</b> at pH $6.0$ .                                                                                                                                                                                                                                                                                                                                                                                                                        |
| 16 | <b>Fig. S16.</b> Effect of addition of ascorbic acid on different photocatalytic systems, containing $0.70$ mM $\text{Ru}(\text{bpy})_3\text{Cl}_2$ and $0.10$ mM <b>1</b> , at pH $6.0$ .                                                                                                                                                                                                                                                                                                                                                                                                                             |
| 17 | <b>Fig. S17.</b> Hydrogen evolution kinetics obtained upon continuous visible irradiation ( $\lambda = 469$ nm) of $1.0$ M buffer pH $6.0$ solutions ( $4$ mL) containing $0.90$ mM $\text{Ru}(\text{bpy})_3\text{Cl}_2$ , $0.15$ M ascorbic acid, and <b>1</b> at $0.02$ mM (a), $0.05$ mM (b), and $0.10$ mM (c) concentration.                                                                                                                                                                                                                                                                                      |
| 18 | <b>Fig. S18.</b> Hydrogen evolution obtained upon continuous visible irradiation ( $\lambda = 469$ nm) of pH $6.0$ solutions ( $4$ mL) containing $0.90$ mM $\text{Ru}(\text{bpy})_3\text{Cl}_2$ , $0.15$ M ascorbic acid, and $0.10$ mM complex <b>1</b> under Ar (black trace), and air (red trace).                                                                                                                                                                                                                                                                                                                 |

|    |                                                                                                                                                                                                                                                                                                                                                                   |
|----|-------------------------------------------------------------------------------------------------------------------------------------------------------------------------------------------------------------------------------------------------------------------------------------------------------------------------------------------------------------------|
| 19 | <b>Fig. S19.</b> Hydrogen evolution obtained upon visible irradiation ( $\lambda = 469$ nm) of pH 6.0 solutions for 2 h, containing 0.30 mM Ru(bpy) <sub>3</sub> Cl <sub>2</sub> and 0.10 mM complex <b>1</b> (black), 0.30 mM Ru(bpy) <sub>3</sub> Cl <sub>2</sub> and 0.15 M ascorbic acid (blue), and 0.15 M ascorbic acid and 0.10 mM complex <b>1</b> (red). |
| 20 | <b>Fig. S20.</b> IR spectrum of complex <b>1</b>                                                                                                                                                                                                                                                                                                                  |
| 21 | <b>Eq. S1.</b> The calculation of TOF (DMF)                                                                                                                                                                                                                                                                                                                       |
| 22 | <b>Eq. S2.</b> The calculation of TOF (Buffer, pH 7.0)                                                                                                                                                                                                                                                                                                            |
| 23 | <b>Table S1.</b> Crystallographic data for <b>1</b>                                                                                                                                                                                                                                                                                                               |
| 24 | <b>Table S2.</b> The selected bond distances for complex <b>1</b>                                                                                                                                                                                                                                                                                                 |
| 25 | <b>Table S3.</b> The selected bond angles for complex <b>1</b>                                                                                                                                                                                                                                                                                                    |

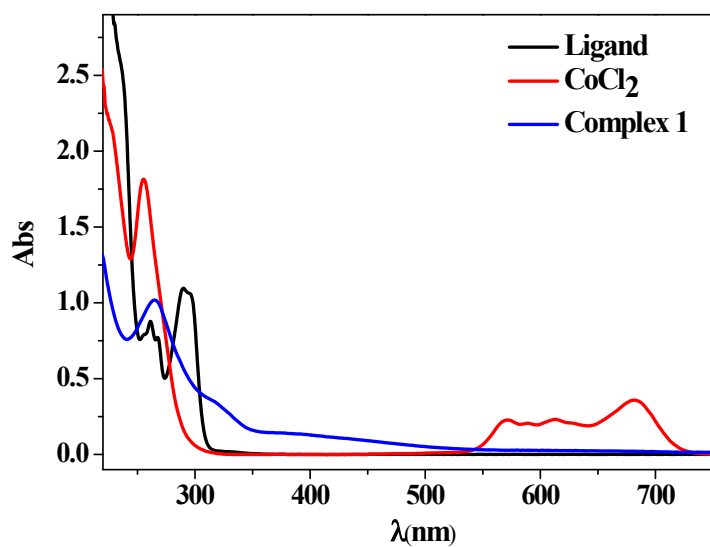

**Fig. S1.** The UV spectra of complex **1** and the related compounds in MeCN.

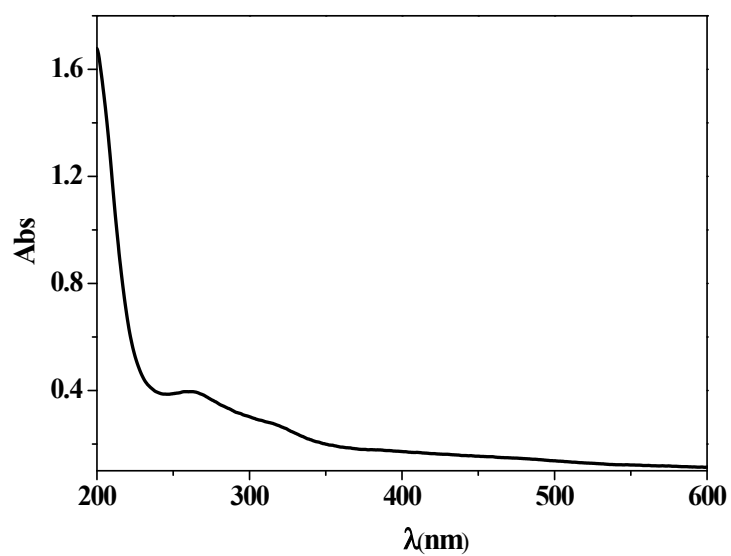

**Fig. S2.** The UV spectrum of 0.10 mM complex **1** in water.

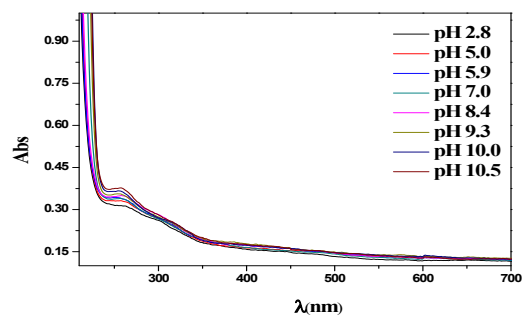

**Fig. S3.** The UV spectra of 0.10 mM complex **1** in 0.25 M phosphate buffered solutions at different pHs.

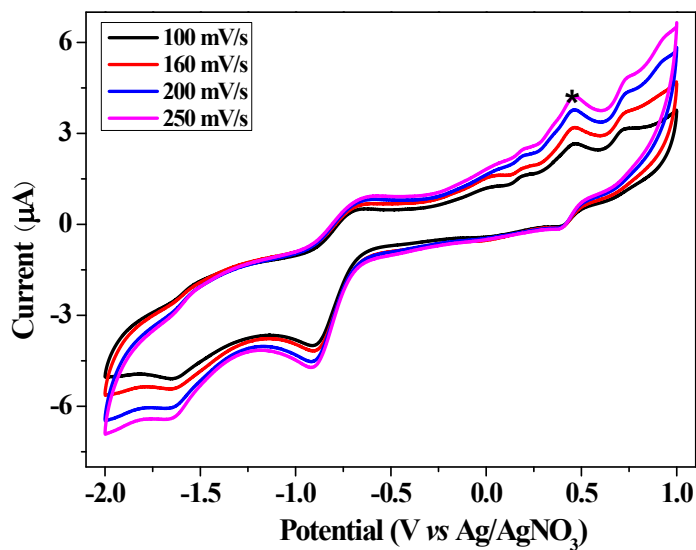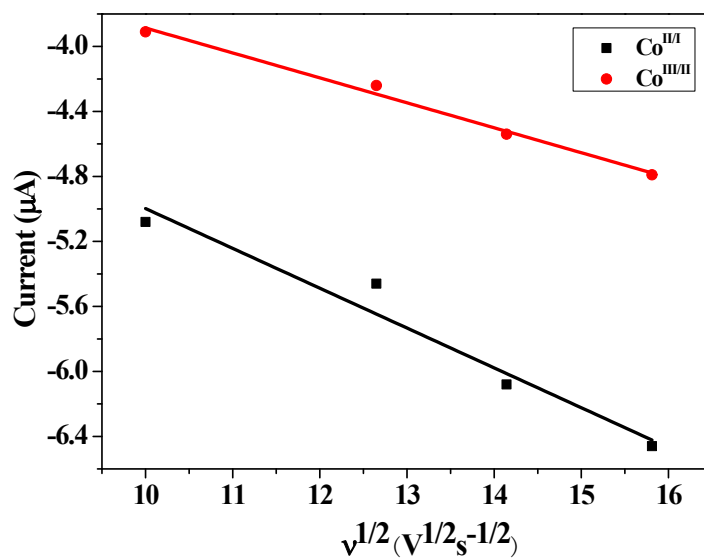

**Fig. S4.** Scan rate dependence of precatalytic waves at -1.58 V (Co<sup>II/I</sup>) and 0.80 V (Co<sup>III/II</sup>) for a 0.25 mM solution of complex **1** (0.10 M [n-Bu<sub>4</sub>N]ClO<sub>4</sub>), at scan rates from 100 to 250 mV/s.

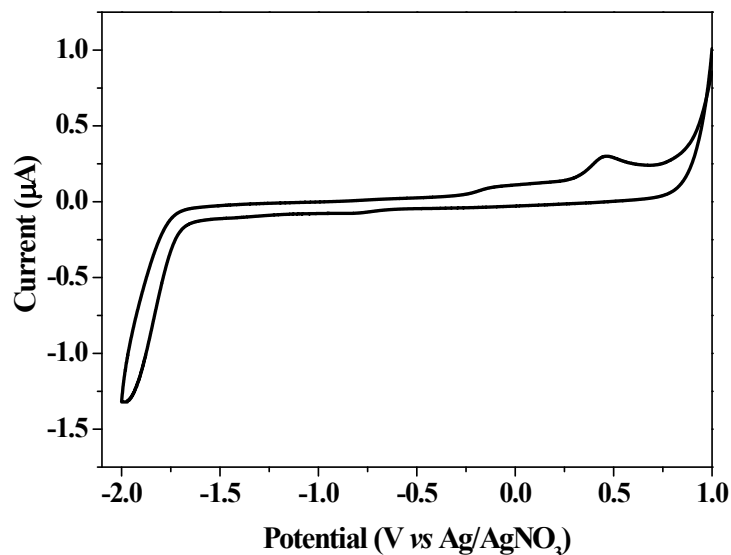

**Fig. S5.** CV of ligand (23 µM). Conditions: 0.10 M [n-Bu<sub>4</sub>N]ClO<sub>4</sub> as supporting electrolyte, scan rate: 100 mV/s, glassy carbon working electrode (1 mm diameter), Pt counter electrode, Ag/AgNO<sub>3</sub> reference electrode.

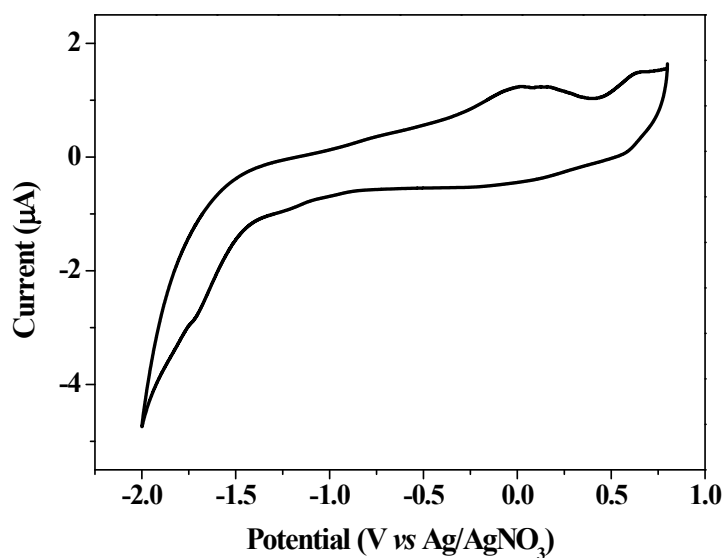

**Fig. S6.** CV of CoCl<sub>2</sub>·6H<sub>2</sub>O (23 µM). Conditions: 0.10 M [n-Bu<sub>4</sub>N]ClO<sub>4</sub> as supporting electrolyte, scan rate: 100 mV/s, glassy carbon working electrode (1 mm diameter), Pt counter electrode, Ag/AgNO<sub>3</sub> reference electrode.

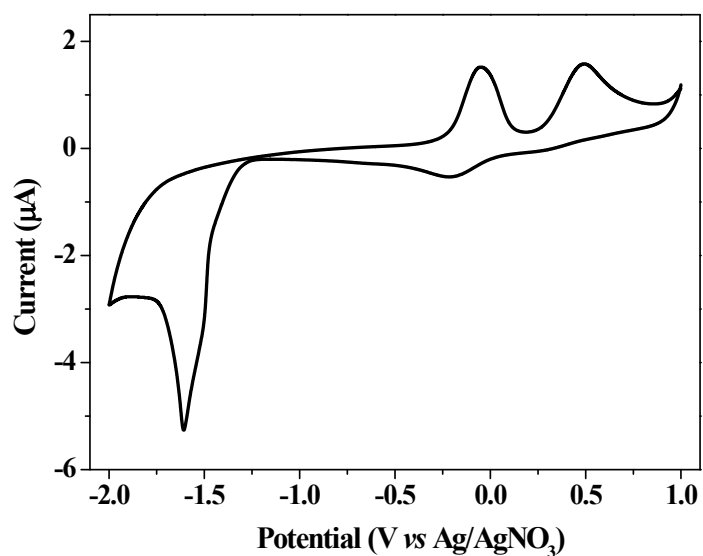

**Fig. S7.** CV of the mixture of  $\text{CoCl}_2 \cdot 6\text{H}_2\text{O}$  ( $23 \mu\text{M}$ ) + ligand ( $23 \mu\text{M}$ ). Conditions:  $0.10 \text{ M}$   $[\text{n-Bu}_4\text{N}]\text{ClO}_4$  as supporting electrolyte, scan rate:  $100 \text{ mV/s}$ , glassy carbon working electrode ( $1 \text{ mm}$  diameter), Pt counter electrode,  $\text{Ag}/\text{AgNO}_3$  reference electrode.

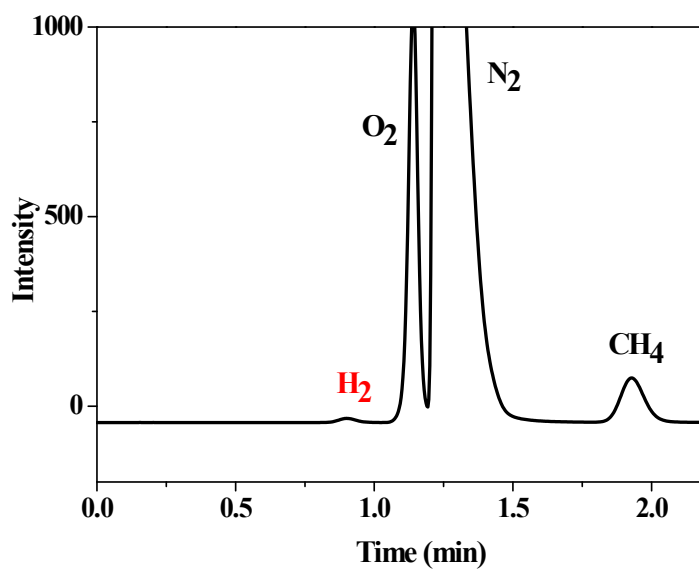

**Fig. S8.** GC traces after a 2-h controlled-potential electrolysis at  $-1.45 \text{ V vs Ag}/\text{AgCl}$  of  $4.0 \mu\text{M}$  complex **1** in DMF with  $3.4 \text{ mM}$  acid. A standard of  $\text{CH}_4$  was added for calibration purposes.

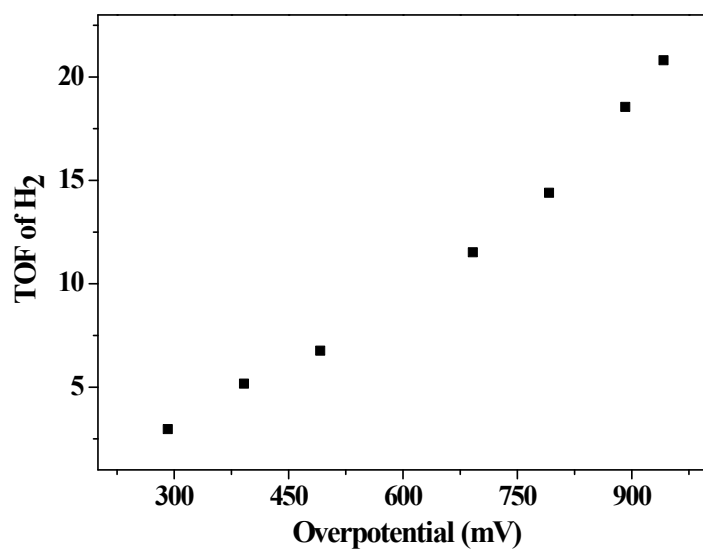

**Fig. S9.** Turnover frequency (mol H<sub>2</sub>/mol catalysts/h) for electrocatalytic hydrogen production by complex **1** (0.25 μM) under a series of overpotentials.

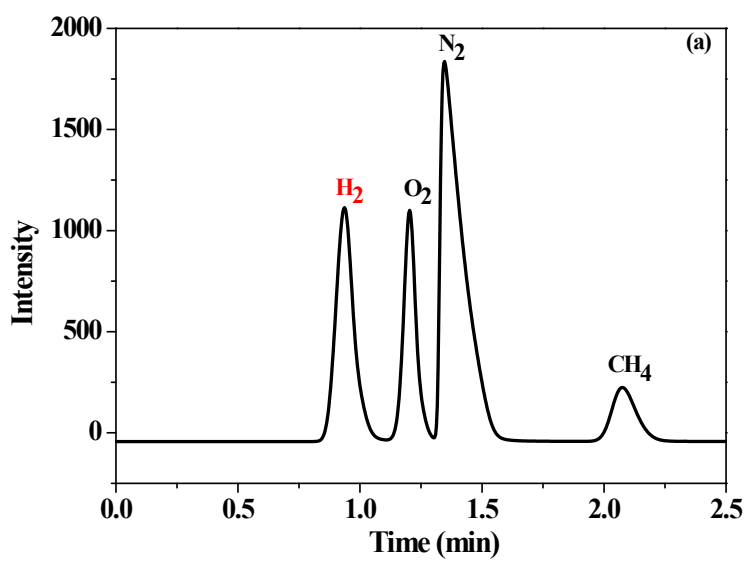



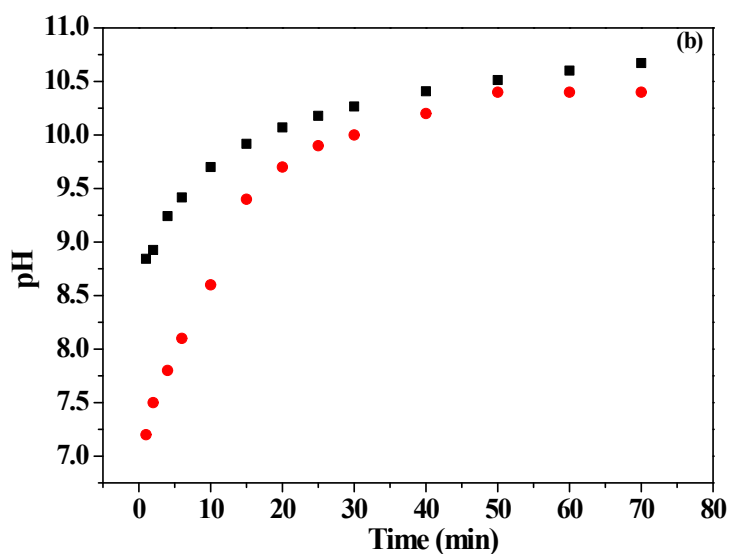

**Fig. S10.** (a) GC traces after a 1-h controlled-potential electrolysis at  $-1.45$  V vs Ag/AgCl of  $2.0 \mu\text{M}$  complex **1** in  $0.25$  M phosphate buffer, pH 7.0. A standard of  $\text{CH}_4$  was added for calibration purposes. (b) Measured (black) and calculated (red) pH changes assuming a 100% Faradic efficiency of complex **1** during electrolysis. (the theoretical pH change over time can be calculated by the equation of

$pH = 14 + \lg \frac{\sum It}{FV}$  where  $I$  = current (A),  $t$  = time (s),  $F$  = Faraday constant ( $96485$  C/mol),  $V$  = solution volume ( $0.04$  L)).

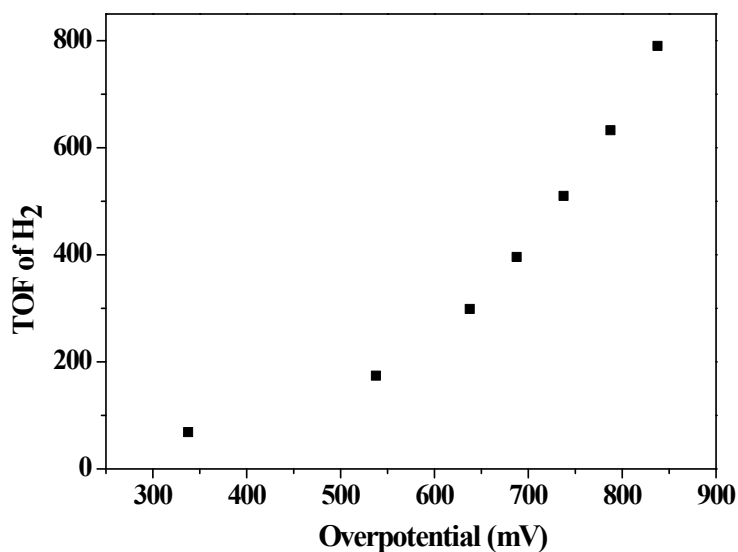

**Fig. S11.** Turnover frequency (mol  $\text{H}_2$ /mol catalysts/h) for electrocatalytic hydrogen production by complex **1** ( $2.0 \mu\text{M}$ ) under a series of overpotentials (mV) at pH 7.0.

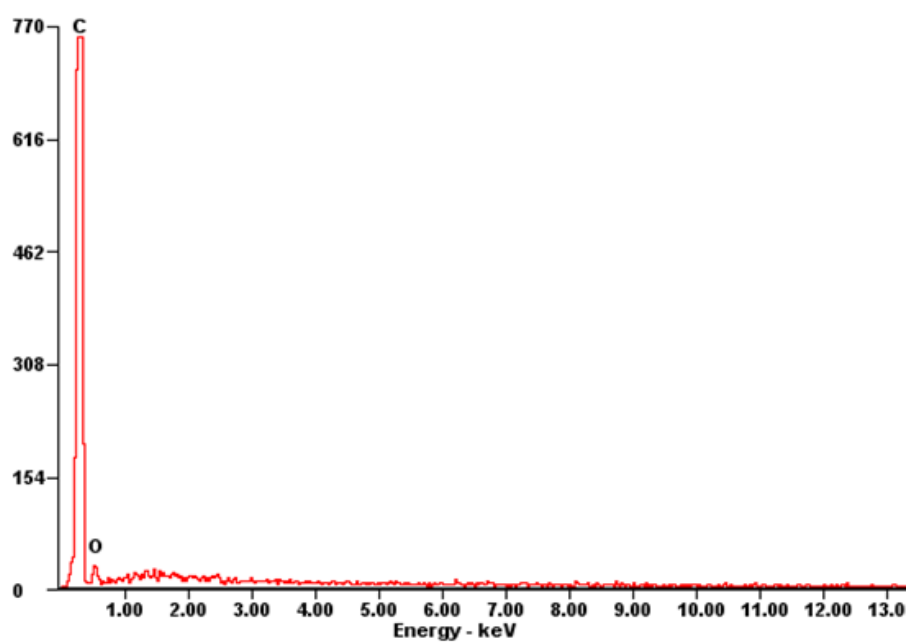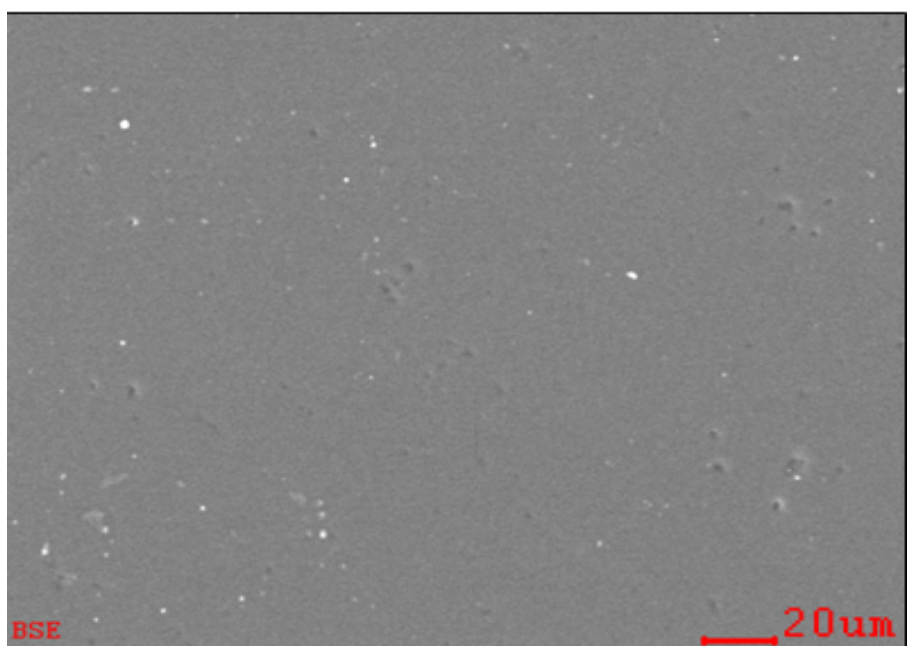

**Fig. S12.** EDS of a glassy carbon electrode after 3 h electrolysis. There was no significant change in the EDS after a 3 h electrolysis period.

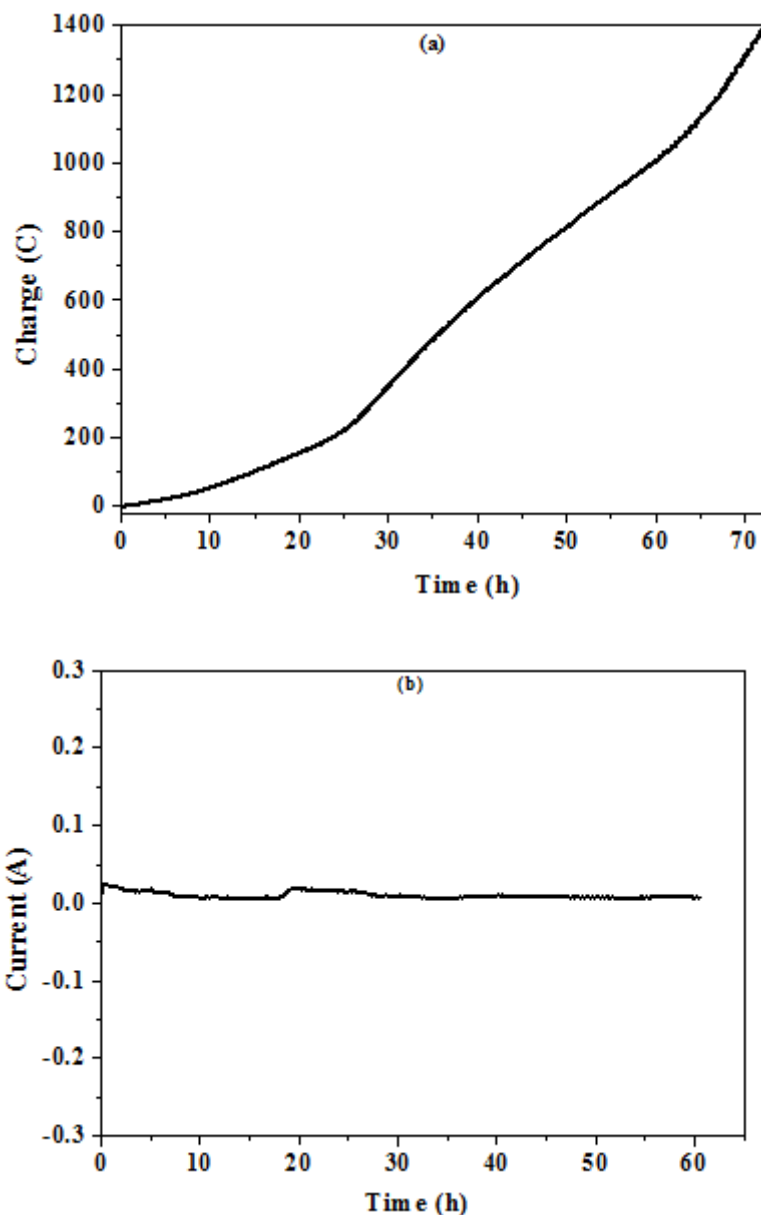

**Fig. S13.** (a) Extended controlled potential electrolysis of 4.5  $\mu\text{M}$  complex **1**, showing charge buildup versus time with an applied potential of -1.45 V versus Ag/AgCl. (b) Catalytic current obtained upon controlled potential electrolysis with 4.5  $\mu\text{M}$  complex **1**. Conditions: 0.25 M buffer solution, pH 7.0, GC working electrode (1.25 cm<sup>2</sup>), Ag/AgCl in saturated KCl reference electrode, Pt wire counter electrode, 60 h.

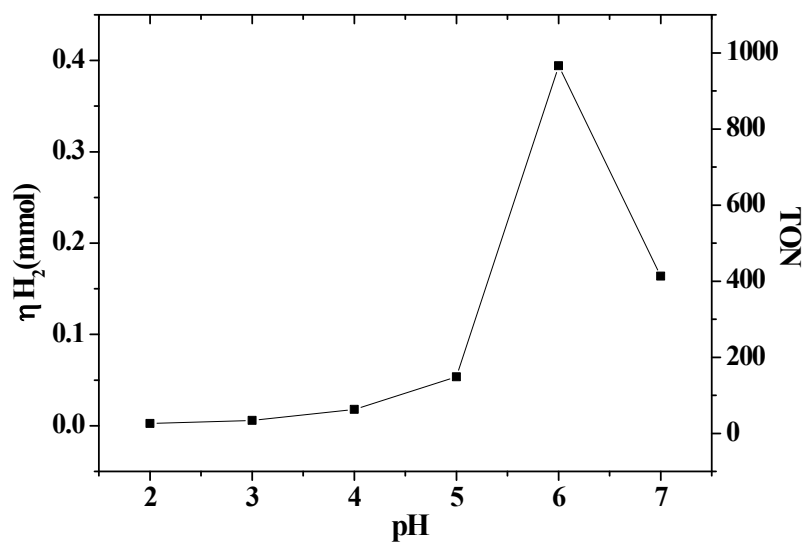

**Fig. S14.** Effect of pHs on different photocatalytic systems, containing 0.70 mM Ru(bpy)<sub>3</sub>Cl<sub>2</sub>, 0.08 M ascorbic acid and 0.10 mM complex **1**, under air.

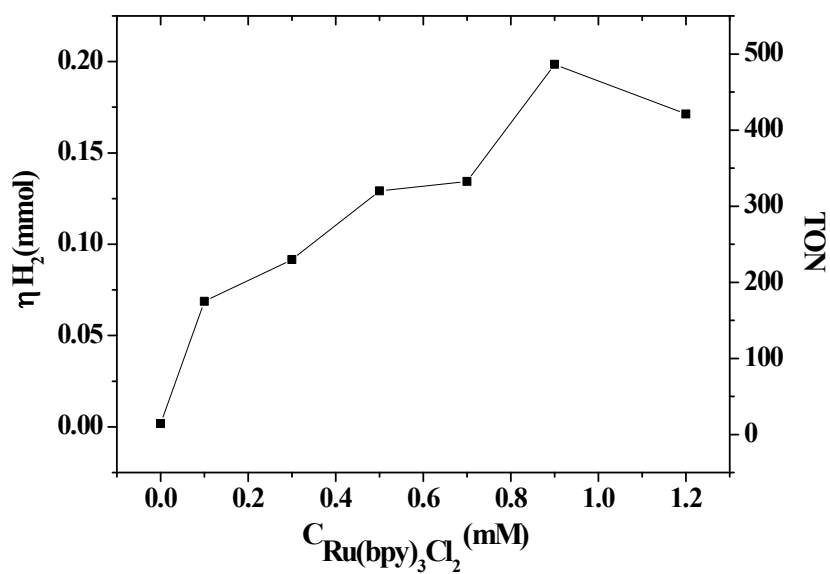

**Fig. S15.** Effect of addition of Ru(bpy)<sub>3</sub>Cl<sub>2</sub> on different photocatalytic systems, containing 0.15 M ascorbic acid and 0.10 mM complex **1** at pH 6.0.

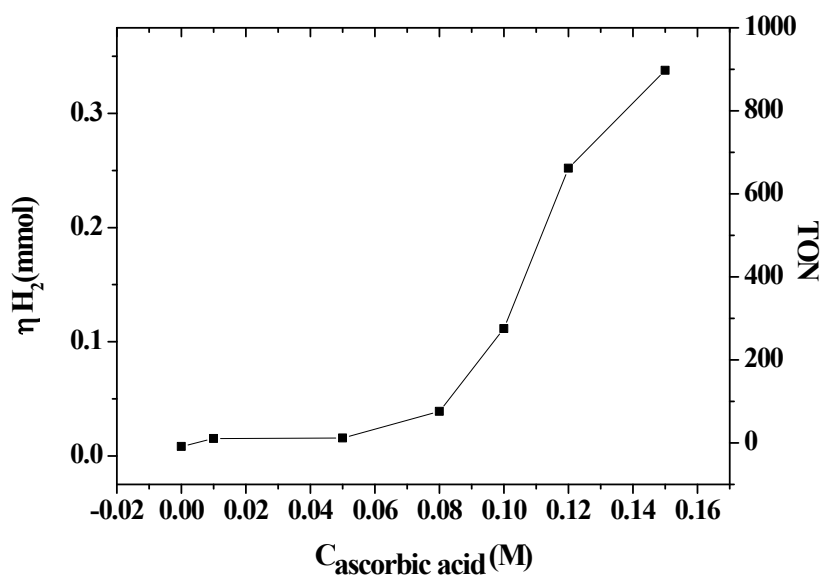

**Fig. S16.** Effect of addition of ascorbic acid on different photocatalytic systems, containing 0.70 mM Ru(bpy)<sub>3</sub>Cl<sub>2</sub> and 0.10 mM **1**, at pH 6.0.

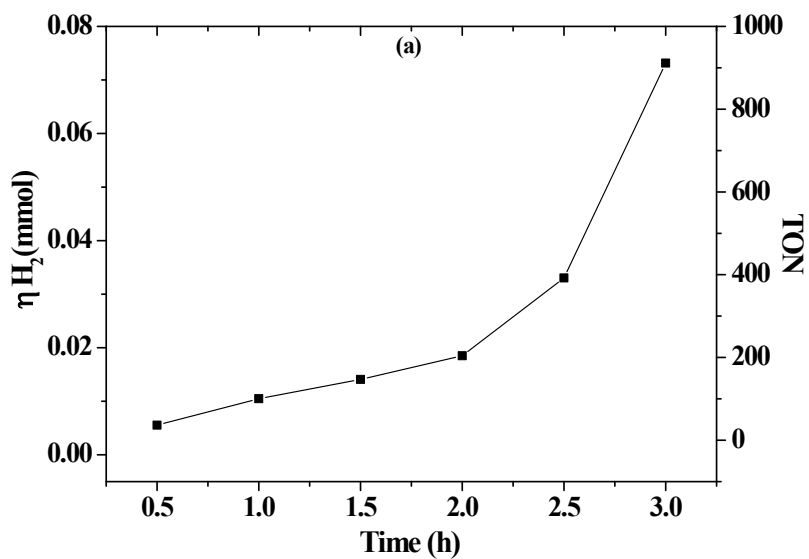

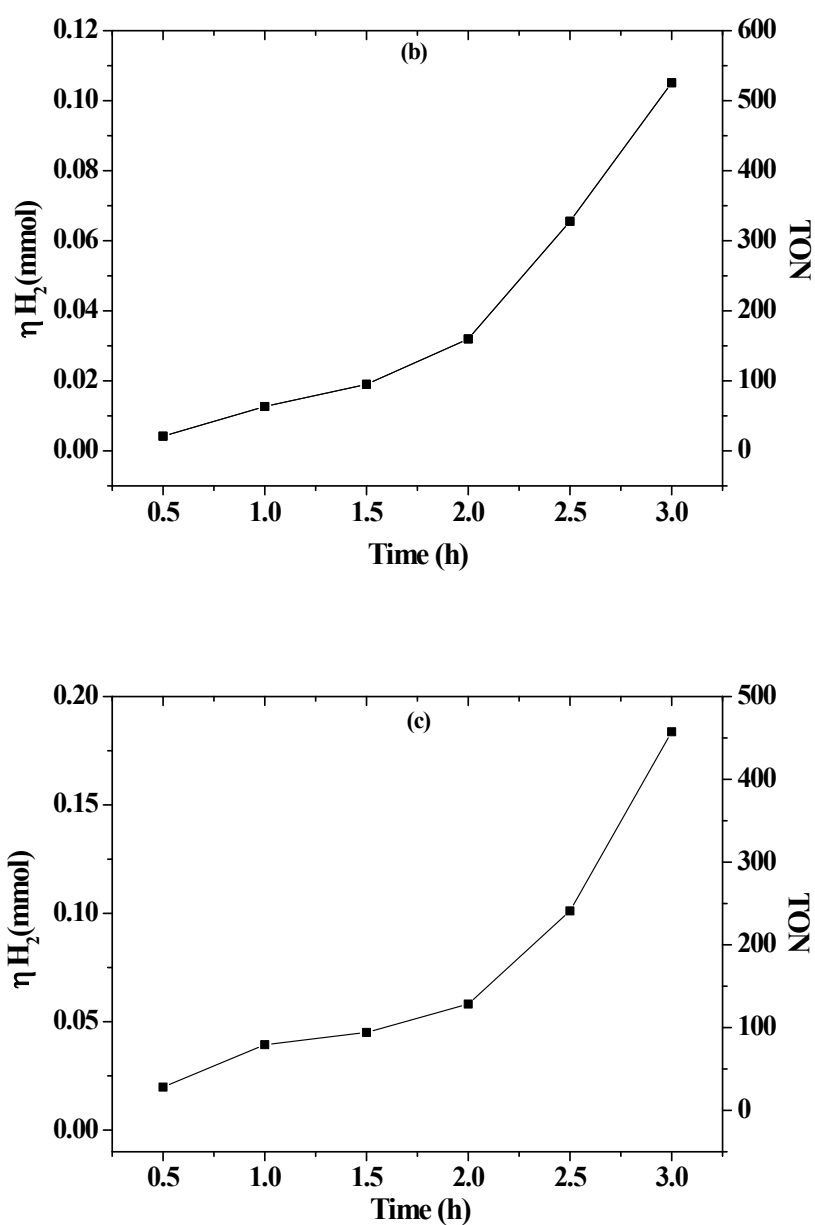

**Fig. S17.** Hydrogen evolution kinetics obtained upon continuous visible irradiation ( $\lambda = 469$  nm) of 1.0 M buffer pH 6.0 solutions (4 mL) containing 0.90 mM  $\text{Ru}(\text{bpy})_3\text{Cl}_2$ , 0.15 M ascorbic acid, and **1** at 0.02 mM (a), 0.05 mM (b), and 0.10 mM (c) concentration.

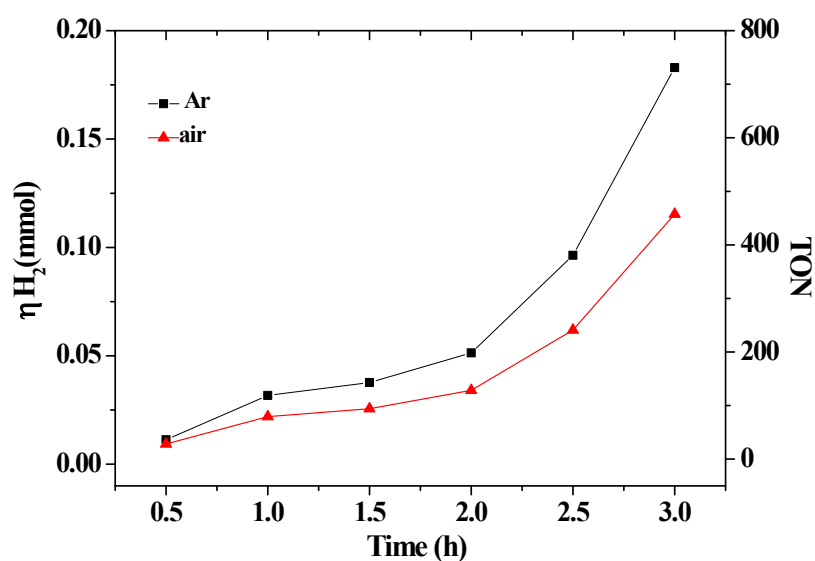

**Fig. S18.** Hydrogen evolution obtained upon continuous visible irradiation ( $\lambda = 469$  nm) of pH 6.0 solutions (4 mL) containing 0.90 mM  $\text{Ru}(\text{bpy})_3\text{Cl}_2$ , 0.15 M ascorbic acid, and 0.10 mM complex **1** under Ar (black trace), and air (red trace).

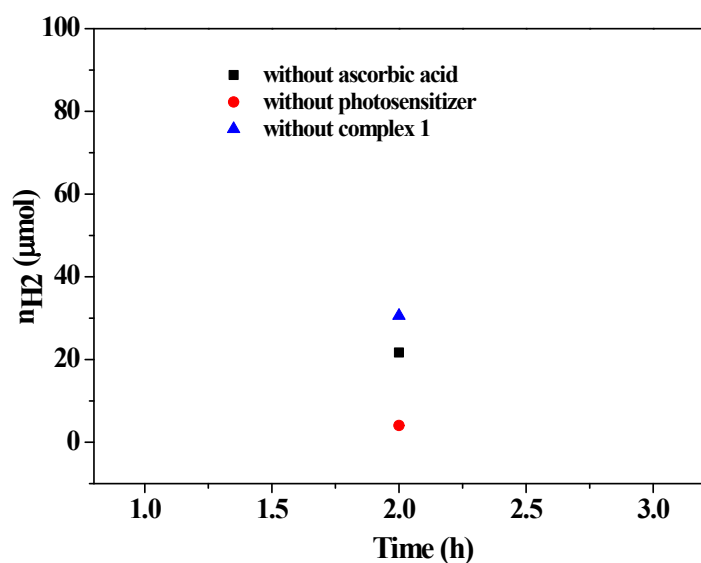

**Fig. S19.** Hydrogen evolution obtained upon visible irradiation ( $\lambda = 469$  nm) of pH 6.0 solutions for 2 h, containing 0.30 mM  $\text{Ru}(\text{bpy})_3\text{Cl}_2$  and 0.10 mM complex **1** (black), 0.30 mM  $\text{Ru}(\text{bpy})_3\text{Cl}_2$  and 0.15 M ascorbic acid (blue), and 0.15 M ascorbic acid and 0.10 mM complex **1** (red).

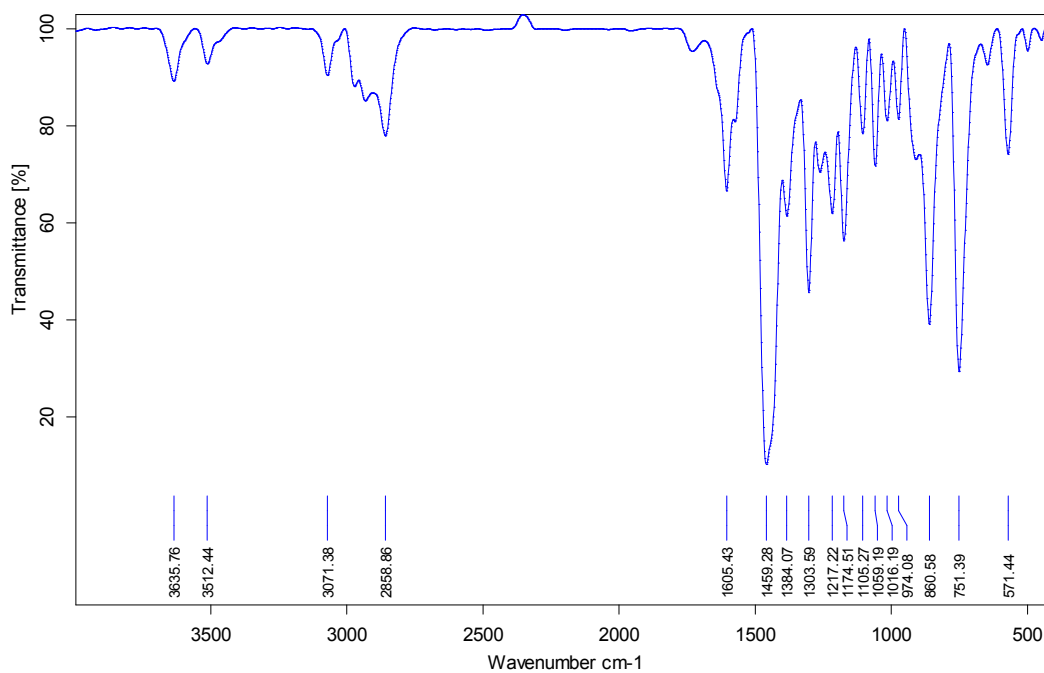

|  |  |
|--|--|
|  |  |
|--|--|

Page 1/1

**Fig. S20.** IR spectrum of complex 1.

$$TOF = \frac{\Delta C}{F \cdot n_1 \cdot n_2 \cdot t} = \frac{11.3016mC \times 3600}{96480C \cdot mol^{-1} \times 2 \times 0.084 \times 10^{-6} mol \times 120} = 20.79h^{-1}$$

**Fig. S1.** The calculation of TOF (DMF)

$$TOF = \frac{\Delta C}{F \cdot n_1 \cdot n_2 \cdot t} = \frac{0.4294C \times 3600}{96480C \cdot mol^{-1} \times 2 \times 0.08 \times 10^{-6} mol \times 120} = 789.6h^{-1}$$

**Eq. S2.** The calculation of TOF (Buffer, pH 7.0)



**Table S1.** Crystallographic data for **1**

---

|                                             |                                                                                  |
|---------------------------------------------|----------------------------------------------------------------------------------|
| Empirical formula                           | C <sub>25</sub> H <sub>26</sub> N <sub>2</sub> O <sub>4</sub> Cl <sub>5</sub> Co |
| Formula weight                              | 654.66                                                                           |
| Temperature/K                               | 296.15                                                                           |
| Crystal system                              | monoclinic                                                                       |
| Space group                                 | P2 <sub>1</sub> /c                                                               |
| a/Å                                         | 14.659(3)                                                                        |
| b/Å                                         | 20.200(4)                                                                        |
| c/Å                                         | 9.5832(18)                                                                       |
| α/°                                         | 90.00                                                                            |
| β/°                                         | 100.056(4)                                                                       |
| γ/°                                         | 90.00                                                                            |
| Volume/Å <sup>3</sup>                       | 2794.1(9)                                                                        |
| Z                                           | 4                                                                                |
| ρ <sub>calc</sub> /cm <sup>3</sup>          | 1.556                                                                            |
| μ/mm <sup>-1</sup>                          | 1.127                                                                            |
| F(000)                                      | 1336.0                                                                           |
| Crystal size/mm <sup>3</sup>                | 0.3 × 0.2 × 0.2                                                                  |
| Radiation                                   | MoKα (λ = 0.71073)                                                               |
| 2θ range for data collection/°              | 5.14 to 50.06                                                                    |
| Index ranges                                | -10 ≤ h ≤ 17, -24 ≤ k ≤ 21, -11 ≤ l ≤ 11                                         |
| Reflections collected                       | 15110                                                                            |
| Independent reflections                     | 4932 [R <sub>int</sub> = 0.0364, R <sub>sigma</sub> = 0.0430]                    |
| Data/restraints/parameters                  | 4932/0/336                                                                       |
| Goodness-of-fit on F <sup>2</sup>           | 1.072                                                                            |
| Final R indexes [I ≥ 2σ (I)]                | R <sub>1</sub> = 0.0660, wR <sub>2</sub> = 0.2023                                |
| Final R indexes [all data]                  | R <sub>1</sub> = 0.0893, wR <sub>2</sub> = 0.2243                                |
| Largest diff. peak/hole / e Å <sup>-3</sup> | 0.56/-1.72                                                                       |

---

**Table S2.** The selected bond distances for complex **1**

| Bond distances (Å)   |            |          |          |
|----------------------|------------|----------|----------|
| Co1-Co1 <sup>1</sup> | 2.9084(14) | Co1-N9   | 1.905(4) |
| Co1-O6               | 1.913(4)   | Co1- N13 | 1.972(4) |
| Co1-O8               | 1.906(4)   | Co1- Cl1 | 1.909(4) |
| Co1-Cl1 <sup>1</sup> | 1.916(4)   |          |          |

**Table S3.** The selected bond Angles for complex **1**

| Bond Angles(°)          |            |                                        |           |
|-------------------------|------------|----------------------------------------|-----------|
| O8-Co1-O6               | 87.01(16)  | Cl1 <sup>1</sup> -Co1-Co1 <sup>1</sup> | 40.42(12) |
| O8-Co1-Cl1 <sup>1</sup> | 171.89(16) | Cl1-Co1-Co1 <sup>1</sup>               | 40.60(12) |
| O8-Co1-Cl1              | 91.07(16)  | Cl1-Co1-O6                             | 89.02(17) |
| N9-Co1-Co1 <sup>1</sup> | 93.20(13)  | Cl1-Co1-N13                            | 93.08(17) |
| Co1 Cl1 Co1             | 98.98(17)  | Cl1-Co1-Cl1 <sup>1</sup>               | 81.02(17) |
